# Supplementary material for: Performance of Afinion HbA1c measurements in general practice as judged by external quality assurance data
Source: publisher site journal article supplement (doi:10.1515/cclm-2019-0879), 2019-12-10
Supplement: Supplementary file 1 [file cclm-2019-0879_suppl.docx]

**Supplemental files to the paper “Performance of Afinion HbA1c measurements in General Practice as judged by External Quality Assurance data”, by Stavelin A, et. al.**

Figure 1. Youden plots for each HbA1c survey showing Afinion participant result 1 (control sample 1) vs Afinion participant result 2 (control sample 2) in relation to target value (red lines) and the participant performance specifications of ± 6% (green lines).

**Afinion HbA1c reagent lot numbers**

Table 1-7 show the number of participants, the target value and median result for each kit reagent lot number for control sample 1 and 2 in the surveys 1-2017, 2-2017, 3-2017, 4-2017, 1-2018, 2-2018 and 3-2018.

Each lot number represent a unique lot code, meaning that if the lot code is the same in two surveys, the lot number is also the same (e.g. lot code 9 represent lot number 10185511 in survey 1-2017, 2-2017 and 3-2017).

Table 1. Afinion reagent lot evaluation in Noklus EQA HbA1c survey 1-2017.

Table 2. Afinion reagent lot evaluation in Noklus EQA HbA1c survey 2-2017.

Table 3. Afinion reagent lot evaluation in Noklus EQA HbA1c survey 3-2017.

| **Target level** | | | **Control sample 1** | | **Control sample 2** | |
| --- | --- | --- | --- | --- | --- | --- |
| 5.25 | | 6.44 | |
| **Lot code** | **Kit reagent lot number** | **Exp. date** | **Median** | **N** | **Median** | **N** |
| 4 | 10182328 | 31.03.2018 | 5.25 | 7 | 6.45 | 7 |
| 9 | 10185511 | 31.10.2018 | 5.15 | 10 | 6.33 | 10 |
| 10 | 10185926 | 30.11.2018 | 5.15 | 14 | 6.35 | 15 |
| 11 | 10186147 | 30.11.2018 | 5.25 | 21 | 6.45 | 20 |
| 12 | 10186921 | 31.12.2018 | 5.25 | 90 | 6.45 | 89 |
| 13 | 10187455 | 28.02.2019 | 5.25 | 13 | 6.35 | 13 |
| 14 | 10188397 | 31.03.2019 | 5.15 | 117 | 6.35 | 117 |
| 15 | 10188585 | 31.03.2019 | 5.15 | 90 | 6.35 | 90 |
| 16 | 10189349 | 31.05.2019 | 5.20 | 296 | 6.45 | 292 |
| 17 | 10189769 | 30.06.2019 | 5.25 | 16 | 6.40 | 16 |
| 18 | 10190252 | 30.06.2019 | 5.25 | 13 | 6.43 | 12 |

Table 4. Afinion reagent lot evaluation in Noklus EQA HbA1c survey 4-2017.

| **Target level** | | | **Control sample 1** | | **Control sample 2** | |
| --- | --- | --- | --- | --- | --- | --- |
| 6.12 | | 6.98 | |
| **Lot code** | **Kit reagent lot number** | **Exp. date** | **Median** | **N** | **Median** | **N** |
| 12 | 10186921 | 31.12.2018 | 6.10 | 33 | 7.05 | 33 |
| 13 | 10187455 | 28.02.2019 | 6.05 | 9 | 6.90 | 9 |
| 14 | 10188397 | 31.03.2019 | 5.95 | 17 | 6.85 | 17 |
| 15 | 10188585 | 31.03.2019 | 6.00 | 13 | 6.85 | 13 |
| 16 | 10189349 | 31.05.2019 | 6.05 | 50 | 6.90 | 49 |
| 17 | 10189769 | 30.06.2019 | 6.00 | 7 | 6.90 | 7 |
| 18 | 10190252 | 30.06.2019 | 6.05 | 273 | 6.90 | 270 |
| 19 | 10190590 | 31.08.2019 | 6.05 | 289 | 6.95 | 290 |
| 20 | 10190990 | 30.09.2019 | 6.05 | 8 | 6.88 | 8 |

Table 5. Afinion reagent lot evaluation in Noklus EQA HbA1c survey 1-2018.

| **Target level** | | | **Control sample 1** | | **Control sample 2** | |
| --- | --- | --- | --- | --- | --- | --- |
| 5.01 | | 6.24 | |
| **Lot code** | **Kit reagent lot number** | **Exp. date** | **Median** | **N** | **Median** | **N** |
| 11 | 10186147 | 30.11.2018 | 5.05 | 5 | 6.25 | 5 |
| 12 | 10186921 | 31.12.2018 | 5.05 | 13 | 6.20 | 12 |
| 13 | 10187455 | 28.02.2019 | 5.00 | 6 | 6.13 | 6 |
| 14 | 10188397 | 31.03.2019 | 4.90 | 9 | 6.05 | 9 |
| 15 | 10188585 | 31.03.2019 | 4.95 | 8 | 6.08 | 8 |
| 16 | 10189349 | 31.05.2019 | 4.90 | 22 | 6.15 | 22 |
| 18 | 10190252 | 30.06.2019 | 5.00 | 74 | 6.10 | 74 |
| 19 | 10190590 | 31.08.2019 | 4.95 | 100 | 6.10 | 99 |
| 20 | 10190990 | 30.09.2019 | 4.90 | 97 | 6.05 | 97 |
| 21 | 10193607 | 31.10.2019 | 4.95 | 347 | 6.10 | 345 |

Table 6. Afinion reagent lot evaluation in Noklus EQA HbA1c survey 2-2018.

| **Target value ->** | | | **Control sample 1** | | **Control sample 2** | |
| --- | --- | --- | --- | --- | --- | --- |
| 5.48 | | 7.72 | |
| **Lot code** | **Lot number** | **Exp. Date** | **Median** | **n** | **Median** | **n** |
| 16 | 10189349 | 05.2019 | 5.40 | 8 | 7.68 | 8 |
| 18 | 10190252 | 06.2019 | 5.40 | 15 | 7.60 | 15 |
| 19 | 10190590 | 08.2019 | 5.35 | 17 | 7.65 | 17 |
| 20 | 10190990 | 09.2019 | 5.25 | 18 | 7.50 | 18 |
| 21 | 10193607 | 10.2019 | 5.35 | 243 | 7.60 | 240 |
| 22 | 10194033 | 11.2019 | 5.40 | 176 | 7.65 | 176 |
| 23 | 10194835 | 01.2020 | 5.45 | 174 | 7.65 | 174 |
| 24 | 10195320 | 02.2020 | 5.35 | 18 | 7.65 | 18 |

Table 7. Afinion reagent lot evaluation in Noklus EQA HbA1c survey 3-2018.

| **Target value ->** | | | **Control sample 1** | | **Control sample 2** | |
| --- | --- | --- | --- | --- | --- | --- |
| 5.00 | | 6.76 | |
| **Lot code** | **Lot number** | **Exp. Date** | **Median** | **n** | **Median** | **n** |
| 18 | 10190252 | 06.2019 | 4.88 | 8 | 6.70 | 8 |
| 19 | 10190590 | 08.2019 | 5.00 | 7 | 6.80 | 7 |
| 21 | 10193607 | 10.2019 | 4.95 | 42 | 6.70 | 41 |
| 22 | 10194033 | 11.2019 | 5.00 | 21 | 6.70 | 22 |
| 23 | 10194835 | 01.2020 | 5.05 | 35 | 6.75 | 35 |
| 24 | 10195320 | 02.2020 | 4.95 | 110 | 6.75 | 112 |
| 25 | 10195436 | 02.2020 | 4.95 | 67 | 6.75 | 69 |
| 26 | 10195679 | 03.2020 | 4.90 | 239 | 6.80 | 235 |
| 27 | 10196709 | 05.2020 | 5.00 | 148 | 6.75 | 148 |
| 28 | 10197038 | 05.2020 | 5.05 | 7 | 6.75 | 7 |
